# Supplementary material
Source: PubMed Central journal article supplement (PMC4382867)
Supplement: NIHMS674410-supplement-Supplement.pdf [file NIHMS674410-supplement-Supplement.pdf]

1 **Supplementary Material**

2 **Association of aspirin and non-steroidal anti-inflammatory drug use with risk of**  
3 **colorectal cancer according to genetic variants**  
4

5 **Description of study populations:**

6 This study is based on the Colon Cancer Family Registry (CCFR) and nine cohorts from  
7 the Genetics and Epidemiology of Colorectal Cancer Consortium (GECCO), which  
8 include nested case-control studies within five prospective US cohorts: Health  
9 Professionals Follow-up Study (HPFS); Nurses' Health Study (NHS); Prostate, Lung,  
10 Colorectal and Ovarian Cancer Screening Trial (PLCO); VITamins And Lifestyle  
11 (VITAL); and Women's Health Initiative (WHI); and four case-control studies:  
12 Darmkrebs: Chancen der Verhütung durch Screening (DACHS) study; Diet, Activity and  
13 Lifestyle Study (DALIS); Ontario Familial Colorectal Cancer Registry (OFCCR); and  
14 Postmenopausal Hormone study-Colon Cancer Family Registry (PMH-CCFR). In the  
15 following we describe each study population used in the genome-wide gene by  
16 environment (G X E) interaction analysis.

17  
18 ***Colon Cancer Family Registry (CCFR)***

19 The CCFR is an NCI-supported consortium consisting of six centers dedicated to the  
20 establishment of a comprehensive collaborative infrastructure for interdisciplinary studies  
21 in the genetic epidemiology of colorectal cancer.<sup>1</sup> The CCFR includes data from  
22 approximately 30,500 total subjects (10,500 probands, and 20,000 unaffected and  
23 affected relatives and unrelated controls). Cases and controls were recruited at the six  
24 participating centers beginning in 1998. CCFR implemented a standardized questionnaire

25 that is administered to all participants, and includes established and suspected risk factors  
26 for colorectal cancer, which includes questions on medical history and medication use,  
27 reproductive history (for female participants), family history, physical activity,  
28 demographics, alcohol and tobacco use, and dietary factors. For genome-wide interaction  
29 analysis we only included the CCFR Set 1 scan, which has been described previously,<sup>2</sup>  
30 includes population-based cases and age-matched controls from the three population-  
31 based centers: Seattle, Toronto and Australia. Cases were genetically enriched by over-  
32 sampling those with a young age at onset or positive family history. Controls were  
33 matched to cases on age and sex. All cases and controls were self-reported as White,  
34 which was confirmed with genotype data. The CCFR Set 2 scan was not included as  
35 controls were same generation family members and the statistical methods used are not  
36 easily applicable to this design.

37

38 ***Darmkrebs: Chancen der Verhütung durch Screening (DACHS)***<sup>3,4</sup>

39 This German study was initiated as a large population-based case-control study in 2003  
40 in the Rhine-Neckar-Odenwald region (southwest region of Germany) to assess the  
41 potential of endoscopic screening for reduction of colorectal cancer risk and to  
42 investigate etiologic determinants of disease, particularly lifestyle/environmental factors  
43 and genetic factors. Cases with a first diagnosis of invasive colorectal cancer (ICD-10  
44 codes C18-C20) who were at least 30 years of age (no upper age limit), German  
45 speaking, a resident in the study region, and mentally and physically able to participate in  
46 a one-hour interview, were recruited by their treating physicians either in the hospital a  
47 few days after surgery, or by mail after discharge from the hospital. Cases were

48 confirmed based on histologic reports and hospital discharge letters following diagnosis  
49 of colorectal cancer. All hospitals treating colorectal cancer patients in the study region  
50 participated. Based on estimates from population-based cancer registries, more than 50%  
51 of all potentially eligible patients with incident colorectal cancer in the study region were  
52 included. Community-based controls were randomly selected from population registries,  
53 employing frequency matching with respect to age (5-year groups), sex, and county of  
54 residence. Controls with a history of colorectal cancer were excluded. Controls were  
55 contacted by mail and follow-up calls. The participation rate was 51%. During an in-  
56 person interview, data were collected on demographics, medical history, family history of  
57 colorectal cancer, and various life-style factors, as were blood and mouthwash samples.  
58 The Set 1 scan consisted of a subset of participants recruited up to 2007, and samples  
59 were frequency matched on age and gender. The Set 2 scan consisted of additional  
60 subjects that were recruited up to 2010 as part of this ongoing study.

61

62 ***Diet, Activity and Lifestyle Study (DALIS)*** <sup>5</sup>

63 DALIS is a population-based case-control study of colon cancer. Participants were  
64 recruited between 1991 and 1994 from three locations: the Kaiser Permanente Medical  
65 Care Program (KPMCP) of Northern California, an eight-county area in Utah, and the  
66 metropolitan Twin Cities area of Minnesota. Eligibility criteria for cases included age at  
67 diagnosis between 30 and 79 years, diagnosis with first primary colon cancer (ICD-O-2  
68 codes 18.0 and 18.2-18.9) between October 1<sup>st</sup> 1991 and September 30<sup>th</sup> 1994, English  
69 speaking, and competency to complete the interview. Individuals with cancer of the  
70 rectosigmoid junction or rectum were excluded, as were those with a pathology report

71 noting familial adenomatous polyposis, Crohn's disease, or ulcerative colitis. A rapid-  
72 reporting system was used to identify all incident cases of colon cancer resulting in the  
73 majority of cases being interviewed within four months of diagnosis. Controls from  
74 KPMCP were randomly selected from membership lists. In Utah, controls under 65 years  
75 of age were randomly selected through random-digit dialing and driver license lists.  
76 Controls, 65 years of age and older, were randomly selected from Health Care Financing  
77 Administration lists. In Minnesota, controls were identified from Minnesota driver's  
78 license or state ID lists. Controls were matched to cases by 5-year age groups and sex. The  
79 Set 1 scan consisted of a subset of the study designed above, from Utah, Minnesota, and  
80 KPMCP, and was restricted to subjects who self-reported as White non-Hispanic. The Set  
81 2 scan consisted of subjects from Utah and Minnesota that were not genotyped in Set 1.  
82 Set 2 was restricted to subjects who self-reported as White non-Hispanic and those that  
83 had appropriate consent to post data to dbGaP.

84

#### 85 ***Health Professionals Follow-up Study (HPFS)*** <sup>6</sup>

86 The HPFS is a parallel prospective study to the Nurses' Health Study (NHS). The HPFS  
87 cohort comprises 51,529 men who, in 1986, responded to a mailed questionnaire. The  
88 participants are U.S. male dentists, optometrists, osteopaths, podiatrists, pharmacists, and  
89 veterinarians born between 1910 and 1946. Participants have provided information on  
90 health related exposures, including: current and past smoking history, age, weight, height,  
91 diet, physical activity, aspirin and/or NSAID use, and family history of colorectal cancer.  
92 Colorectal cancer and other outcomes were reported by participants or next-of-kin and  
93 followed up through review of the medical and pathology record by physicians. Overall,

94 more than 97% of self-reported colorectal cancers were confirmed by medical record  
95 review. Information was abstracted on histology and primary location. Follow-up has  
96 been excellent, with 94% of the men responding to date. Colorectal cancer cases were  
97 ascertained through January 1, 2008. In 1993-95, 18,825 men in HPFS mailed in blood  
98 samples by overnight courier which were aliquoted into buffy coat and stored in liquid  
99 nitrogen. In 2001-04, 13,956 men in HPFS who had not previously provided a blood  
100 sample mailed in a "swish-and-spit" sample of buccal cells. Incident cases are defined as  
101 those occurring after the subject provided a blood or buccal sample. Prevalent cases are  
102 defined as those occurring after enrollment in the study in 1986, but prior to the subject  
103 providing either a blood or buccal sample. After excluding participants with histories of  
104 cancer (except non-melanoma skin cancer), ulcerative colitis, or familial polyposis, two  
105 case-control sets were constructed from which DNA was isolated from either buffy coat  
106 or buccal cells for genotyping: 1) a case-control set with cases of colorectal cancer  
107 matched to randomly selected controls who provided a blood sample and were free of  
108 colorectal cancer at the same time the colorectal cancer was diagnosed in the cases; 2) a  
109 case-control set with cases of colorectal cancer matched to randomly selected controls  
110 who provided a buccal sample and were free of colorectal cancer at the same time the  
111 colorectal cancer was diagnosed in the cases. For both case-control sets, matching criteria  
112 included year of birth (within 1 year) and month/year of blood or buccal cell sampling  
113 (within six months). Cases were pair matched 1:1, 1:2, or 1:3 with a control  
114 participant(s).

115

116 *Nurses' Health Study (NHS)* <sup>7</sup>

117 The NHS cohort began in 1976 when 121,700 married female registered nurses aged 30  
118 to 55 years returned the initial questionnaire that ascertained a variety of important  
119 health-related exposures. Since 1976, follow-up questionnaires have been mailed every  
120 two years. Colorectal cancer and other outcomes were reported by participants or next-of-  
121 kin and followed up through review of the medical and pathology record by physicians.  
122 Overall, more than 97% of self-reported colorectal cancers were confirmed by medical-  
123 record review. Information was abstracted on histology and primary location. Follow-up  
124 has been high: as a proportion of the total possible follow-up time, follow-up has been  
125 over 92%. Colorectal cancer cases were ascertained through June 1, 2008. In 1989-90,  
126 32,826 women in NHS mailed in blood samples by overnight courier which were  
127 aliquoted into buffy coat and stored in liquid nitrogen. In 2001-04, 29,684 women in  
128 NHS who did not previously provide a blood sample mailed in a "swish-and-spit" sample  
129 of buccal cells. Incident cases are defined as those occurring after the subject provided a  
130 blood or buccal sample. Prevalent cases are defined as those occurring after enrollment in  
131 the study in 1976, but prior to the subject providing either a blood or buccal sample. After  
132 excluding participants with histories of cancer (except non-melanoma skin cancer),  
133 ulcerative colitis, or familial polyposis, we constructed two case-control sets from which  
134 DNA was isolated from either buffy coat or buccal cells for genotyping: 1) a case-control  
135 set with cases of colorectal cancer matched to randomly selected controls who provided a  
136 blood sample and were free of colorectal cancer at the same time the colorectal cancer  
137 was diagnosed in the cases; 2) a case-control set with cases of colorectal cancer matched  
138 to randomly selected controls who provided a buccal sample and were free of colorectal  
139 cancer at the same time the colorectal cancer was diagnosed in the cases. For both case-

140 control sets, matching criteria included year of birth (within one year) and month/year of  
141 blood or buccal cell sampling (within six months). Cases were pair matched 1:1, 1:2, or  
142 1:3 with a control participant(s).

143

#### 144 ***Ontario Familial Colorectal Cancer Registry (OFCCR)***

145 A subset of the Assessment of Risk in Colorectal Tumours in Canada (ARCTIC) from the  
146 Ontario Registry for Studies of Familial Colorectal Cancer (OFCCR) was used. Both the  
147 case-control study<sup>8</sup> and the OFCCR<sup>9</sup> have been described in detail previously, as have  
148 genome-wide association study (GWAS) results.<sup>10</sup> In brief, cases were confirmed  
149 incident colorectal cancer cases ages 20 to 74 years, residents of Ontario identified  
150 through comprehensive registry and diagnosed between July 1998 and June 2003.

151 Population-based controls were randomly selected among Ontario residents (random-  
152 digit-dialing and listing of all Ontario residents), and matched by sex and 5-year age  
153 groups. A total of 1,236 colorectal cancer cases and 1,223 controls were successfully  
154 genotyped on at least one of the Illumina 1536 GoldenGate assay, the Affymetrix  
155 GeneChip® Human Mapping 100K and 500K Array Set, and a 10K non-synonymous  
156 SNP chip. Analysis was based on a set of unrelated subjects who were non-Hispanic,  
157 White by self-report or by investigation of genetic ancestry. We further excluded subjects  
158 if there was a sample mix-up, if they were missing epidemiologic questionnaire data, if  
159 they were appendix cases, or if they were overlapped with the Colon Cancer Family  
160 Registry GWAS. Additionally, only samples genotyped on the Affymetrix GeneChip®  
161 500K Array were utilized in order to avoid coverage issues in imputation.

162

163 ***Prostate, Lung, Colorectal and Ovarian Cancer Screening Trial (PLCO)***

164 PLCO enrolled 154,934 participants (men and women, aged between 55 and 74 years) at  
165 ten centers into a large, randomized, two-arm trial to determine the effectiveness of  
166 screening to reduce cancer mortality. Sequential blood samples were collected from  
167 participants assigned to the screening arm. Participation was 93% at the baseline blood  
168 draw. In the observational (control) arm, buccal cells were collected via mail using the  
169 “swish-and-spit” protocol and participation rate was 65%. Details of this study have been  
170 previously described<sup>11,12</sup> and are available online (<http://dcp.cancer.gov/plco>). The Set 2  
171 GWAS data used in this study included a subset of 485 colorectal cancer cases from both  
172 arms of the trial. Samples were excluded if participants did not sign appropriate consents,  
173 if DNA was unavailable, if baseline questionnaire data with follow-up were unavailable,  
174 if they had a history of colon cancer prior to the trial, if they were a rare cancer, and if  
175 they were already in colon GWAS, or if they were a control in the prostate or lung  
176 populations. Controls were frequency matched 1:1 to cases without replacement, and  
177 cases were not eligible to be controls. Matching criteria were age at enrollment (two year  
178 blocks), enrollment date (two year blocks), sex, race/ethnicity, trial arm, and study year  
179 of diagnosis (i.e., controls must be cancer free into the case’s year of diagnosis).

180

181 ***Postmenopausal Hormone study-Colon Cancer Family Registry (PMH-CCFR)***<sup>13</sup>

182 Eligible case patients included all female residents, ages 50 to 74 years, residing in the 13  
183 counties in Washington State reporting to the Cancer Surveillance SEER program, who  
184 were newly diagnosed with invasive colorectal adenocarcinoma (ICD-O C18.0, C18.2-.9,  
185 C19.9, C20.0-.9) between October 1998 and February 2002. Eligibility for all individuals



186 was limited to those who were English-speaking with available telephone numbers, in  
187 which they could be contacted. On average, cases were identified within four months of  
188 diagnosis. The overall response proportion of eligible cases identified was 73%.  
189 Community-based controls were randomly selected according to age distribution (in 5-  
190 year age intervals) of the eligible cases by using lists of licensed drivers from the  
191 Washington State Department of Licensing for individuals, ages 50 to 64 years, and  
192 rosters from the Health Care Financing Administration (now the Centers for Medicare  
193 and Medicaid) for individuals older than 64 years. The overall response proportion of  
194 eligible controls was 66%. In GECCO, samples with sufficient DNA extracted from  
195 blood were genotyped. Only participants that were not part of the CCFR Seattle site were  
196 included in the sample set.

197

### 198 *VITamins And Lifestyle (VITAL)*

199 The VITamins And Lifestyle (VITAL) cohort comprises of 77,721 Washington State  
200 men and women aged 50 to 76 years, recruited from 2000 to 2002 to investigate the  
201 association of supplement use and lifestyle factors with cancer risk. Subjects were  
202 recruited by mail, from October 2000 to December 2002, using names purchased from a  
203 commercial mailing list. All subjects completed a 24 page questionnaire and buccal cell  
204 specimens for DNA were self-collected by 70% of the participants. Subjects are followed  
205 for cancer by linkage to the western Washington Surveillance, Epidemiology, and End  
206 Results (SEER) cancer registry and are censored when they move out of the area covered  
207 by the registry or at time of death. Details of this study have been previously described.<sup>14</sup>  
208 In GECCO, a nested case-control set was genotyped. Samples included, colorectal cancer

209 cases with DNA, excluding subjects with colorectal cancer before baseline, in situ cases,  
210 (large cell) neuroendocrine carcinoma, squamous cell carcinoma, carcinoid tumor, Goblet  
211 cell carcinoid, any type of lymphoma, including non-Hodgkin, Mantle cell, large B-cell,  
212 or follicular lymphoma. Controls were matched on age at enrollment (within one year),  
213 enrollment date (within one year), sex, and race/ethnicity. One control was randomly  
214 selected per case among all controls that matched on the four factors above and where the  
215 control follow-up time was greater than follow-up time of the case until diagnosis.

216

### 217 ***Women's Health Initiative (WHI)***

218 WHI is a long-term health study of 161,808 post-menopausal women aged 50 to 79 years  
219 at 40 clinical centers throughout the US. WHI comprises a Clinical Trial (CT) arm, an  
220 Observational Study (OS) arm, and several extension studies. The details of WHI have  
221 been previously described<sup>15,16</sup> and are available online  
222 (<https://cleo.whi.org/SitePages/Home.aspx>). In GECCO, Set 1 cases were selected from  
223 the September 12, 2005 database and were comprised of centrally adjudicated colon  
224 cancer cases from the Observational Study (OS) who self-reported as White. Controls  
225 were first selected among controls previously genotyped as part of a Hip Fracture GWAS  
226 conducted within the WHI-OS and matched to cases on age (within three years),  
227 enrollment date (within 365 days), hysterectomy status, and prevalent conditions at  
228 baseline. For 37 cases, there was not a control match in the Hip Fracture GWAS. For  
229 these participants, we identified a matched control in the WHI-OS based on same criteria.  
230 In the Set 2 scan, cases were selected from the August 2009 database and were comprised  
231 of centrally adjudicated colorectal cancer cases from the OS and CT who were not

232 genotyped in Set 1. In addition, case and control participants were subject to the  
233 following exclusion criteria: a prior history of colorectal cancer at baseline, IRB approval  
234 not available for data submission into dbGaP, and not sufficient DNA available.  
235 Matching criteria included age (within years), race/ethnicity, WHI date (within three  
236 years), WHI Calcium and Vitamin D study date (within three years), and randomization  
237 arms (OS flag, hormone therapy assignments, dietary modification assignments,  
238 calcium/vitamin D assignments). In addition, they were matched on the four regions of  
239 randomization centers. Each case was matched with one control (1:1) that exactly met the  
240 matching criteria. Control selection was done in a time-forward manner, selecting one  
241 control for each case first from the risk set at the time of the case's event. The matching  
242 algorithm was allowed to select the closest match based on a criterion to minimize an  
243 overall distance measure.<sup>17</sup> Each matching factor was given the same weight. Additional  
244 available controls that were genotyped as part of the Hip Fracture GWAS were included  
245 to improve power.

246

#### 247 **Harmonization of environmental data:**

248 All exposure information within each study, including regular use of aspirin and/or non-  
249 steroidal anti-inflammatory drug (NSAID) and other colorectal cancer-related factors, was  
250 collected by in-person interviews and/or structured questionnaires, as detailed  
251 previously.<sup>1,3,5,11,16,18-20</sup> We carried out a multi-step data harmonization procedure,  
252 reconciling each study's unique protocols and data-collection instruments at the GECCO  
253 coordinating center (Fred Hutchinson Cancer Research Center). First, we defined common  
254 data elements (CDEs). We examined the questionnaires and data dictionaries for each study

255 to identify study-specific data elements that could be mapped to the CDEs. Through an  
256 iterative process, we communicated with each data contributor to obtain relevant data and  
257 coding information. The data elements were combined into a single dataset with common  
258 definitions, standardized permissible values and coding. The mapping and resulting data  
259 were reviewed for quality assurance, and range and logic checks were performed to assess  
260 data distributions within and between studies. Outlying samples were truncated to the  
261 minimum or maximum value of a pre-defined range for each variable. The reference time  
262 for cohort studies was time of enrollment (WHI, PLCO, and VITAL) or blood draw (HPFS  
263 and NHS). Dichotomous variables for regular use of either aspirin and/or NSAIDs (yes or  
264 no) or aspirin-only (yes or [no, regardless of use of other NSAIDs]) at the reference time  
265 were used for data analyses. The exact definition of regular use of aspirin and/or NSAIDs  
266 (including use of aspirin-only, NSAIDs-only, or both aspirin and NSAIDs), which was  
267 determined individually by each study cohort, is provided in **Table 1**. Non-regular users  
268 were considered as the reference. Data harmonization was performed using SAS and T-  
269 SQL.

270

271 **Genotyping, quality assurance/quality control and imputation:**

272 All analyses were based on genotyped data generated from genome-wide association  
273 scans and imputation to HapMap II. We note that genotyping for some cohorts was  
274 conducted at two different time points (i.e., sets 1 and 2) based on the availability of  
275 funds and samples. We accounted for this accordingly in the statistical analysis by  
276 analyzing each set separately before meta-analyzing data. Also, we have genotyped the  
277 cases and their matched controls together at the same time to avoid bias. CCFR

278 genotyping was based on Illumina Human1M.<sup>2</sup> Phase one genotyping of DAL5 Set 1 and  
279 WHI Set 1 was done using Illumina HumanHap 550K/610K and Illumina 550Kduo/610K,  
280 respectively, and has been described previously.<sup>21</sup> OFCCR was genotyped using  
281 Affymetrix platforms.<sup>10</sup> DACHS Set 1, DAL5 Set 2, PMH-CCFR, PLCO Set 2, VITAL,  
282 and WHI Set 2 were genotyped using Illumina HumanCytoSNP. HPFS, NHS, and  
283 DACHS Set 2 were genotyped using Illumina HumanOmniExpress.

284

285 DNA was extracted from blood samples or, for a subset of DACHS, HPFS, NHS, and  
286 PLCO samples, and for all VITAL samples, from buccal cells, using conventional  
287 methods. All studies included 1 to 6% blinded duplicates to monitor quality of the  
288 genotyping. All individual-level genotype data were managed, and underwent quality  
289 assurance and quality control (QA/QC) at University of Southern California (CCFR), the  
290 Ontario Institute for Cancer Research (OFCCR), the University of Washington Genetics  
291 Coordinating Center (HPFS, NHS, and DACHS Set 2), or the GECCO Coordinating  
292 Center at the Fred Hutchinson Cancer Research Center (all other studies). Details on the  
293 QA/QC can be found in **Supplementary Table 1**. In brief, samples were excluded based  
294 on call rate, heterozygosity, unexpected duplicates, gender discrepancy, and unexpectedly  
295 high identity-by-descent or unexpected genotype concordance (> 65%) with another  
296 individual. All analyses were restricted to samples clustering with the Utah residents with  
297 Northern and Western European ancestry from the CEPH collection (CEU) population in  
298 principal component analysis,<sup>22</sup> including the HapMap II populations as reference. Single  
299 nucleotide polymorphisms (SNPs) were excluded if they were triallelic, not assigned a rs  
300 number, or were reported or observed as not performing consistently across platforms.

301 Additionally, genotyped SNPs were excluded based on call rate ( $< 98\%$ ), lack of Hardy-  
302 Weinberg Equilibrium in controls (HWE,  $P < 1 \times 10^{-4}$ ), and minor allele frequency (MAF  
303  $< 5\%$  for WHI Set 1, DAL5 Set 1, and OFCCR;  $MAF < 5 / \#$  of samples for each other  
304 study). As imputation of genotypes is established as standard practice in the genetic  
305 association analysis, all autosomal SNPs of each study were imputed to the CEU  
306 population in HapMap II release 24, with the exception of OFCCR, which was imputed  
307 to HapMap II release 22. CCFR was imputed using IMPUTE,<sup>10</sup> OFCCR was imputed  
308 using BEAGLE,<sup>23</sup> and all other studies were imputed using MACH.<sup>24</sup> Imputed data were  
309 merged with genotype data such that genotype data were used if a SNP had both types of  
310 data, unless there was a difference in terms of reference allele frequency ( $> 0.1$ ) or  
311 position ( $> 100$  base pairs), in which case imputed data were used. Given the high  
312 agreement of imputation accuracy among MACH, IMPUTE, and BEAGLE,<sup>25</sup> the  
313 common practice of using different imputation programs is unlikely to cause  
314 heterogeneity<sup>26</sup> and the results can be combined without any further correction. We  
315 calculated  $R^2$  as a measurement of imputation accuracy. SNPs were restricted based on  
316 per study  $MAF > 5 / \#$  of samples and per study imputation accuracy ( $R^2 > 0.3$ ). After  
317 imputation and quality control (QC) analyses, a total of about 2.7 million SNPs were used  
318 in the analysis. In the statistical analyses, both genotyped and imputed SNPs were  
319 examined as continuous variables (i.e., assuming log-additive effects). Briefly, under the  
320 log-additive model, the statistical effect of a homozygous variant genotype is assumed to  
321 be twice the statistical effect of a heterozygous genotype on a logit-scale. This is  
322 equivalent to considering genotype according to dosage or number of variant alleles (0, 1  
323 and 2) and evaluating its contribution to the model as a continuous covariate. For imputed

324 genotypes, we obtained the posterior probabilities for heterozygous and homozygous  
325 variant genotypes from the MACH imputation program to calculate the expected dosage  
326 as  $2\text{Pr}(\text{Genotype}=\text{AA}) + \text{Pr}(\text{Genotype}=\text{Aa})$ . Because the posterior probabilities are  
327 constrained between 0 and 1, the expected dosage will be between 0 and 2. We have  
328 previously shown that the expected dosage provides a valid inference of the actual  
329 number of variant alleles.<sup>27</sup> To evaluate overall performance, we calculated the genomic  
330 inflation factor ( $\lambda$ ) to measure the over-dispersion of the test-statistics from the marginal  
331 association tests by dividing the median of the squared Z statistics by 0.455, the median  
332 of a chi-squared distribution with 1 degree of freedom. The inflation factor  $\lambda$  was  
333 between 0.999 and 1.044 for individual studies based on all SNPs including both directly  
334 genotyped and imputed, indicating there is little evidence of residual population  
335 substructure, cryptic relatedness, or differential genotyping between cases and controls.  
336 This result was consistent with the visual inspection of the study-specific quantile-  
337 quantile (Q-Q) plots.

338

### 339 **Statistical models for interaction analyses:**

340 For the conventional logistic regression analysis, we modeled G X E interaction using the  
341 cross-product of number of copies of the variant allele for the SNP and the regular use of  
342 aspirin and/or NSAIDs while simultaneously adjusting for the main associations of the  
343 SNP and use of aspirin and/or NSAIDs with colorectal cancer risk. For conventional  
344 logistic regression analysis, we fitted the log-additive model:  $\text{Logit}(\text{Pr}(D=1)) = b_0 +$   
345  $b_1*(\text{NSAID}=1) + b_2*E(G) + b_3*(\text{NSAID}=1)*E(G)$ , where  $E(G)$  is expected dosage for  
346 imputed SNPs and dosage for genotyped SNPs. For case-only interaction analysis, we  
347 also fitted conventional logistic regression but in colorectal cancer cases only. The

348 models are:  $\log(\text{prob}(G=1|D=1)/\text{prob}(G=0|D=1)) = b_{01} + b_3*(\text{NSAID}=1)$ ; and  
 349  $\log(\text{prob}(G=2|D=1)/\text{prob}(G=0|D=1)) = b_{02} + 2b_3*(\text{NSAID}=1)$ ; note that  $b_3$  in the case-  
 350 only logistic regression model is the same parameter as the interaction statistical effect  $b_3$   
 351 in the case-control logistic regression model. The G and E association in case-only  
 352 analysis is equivalent to G X E interaction analysis when G and E are independent in the  
 353 population and the disease is rare, because in this case the correlation of G and E is  
 354 approximately 0 in the controls. The case-only test improves statistical power  
 355 considerably compared with the conventional case-control interaction test under some  
 356 scenarios, as the analysis does not need to account for the variation in the control  
 357 population when the G and E are independent in the population.

358

359 **Stratified analysis:**

360 We performed stratified analysis for the SNPs showing gene-environment (G X E)  
 361 interaction with aspirin and/or NSAID use using conventional logistic regression. We  
 362 estimated the association of aspirin and/or NSAID use with colorectal cancer risk stratified  
 363 by SNP genotypes, as well as the associations in strata defined by SNP and use of aspirin  
 364 and/or NSAID with one common reference group. We pooled the studies for the stratified  
 365 analyses to minimize strata with small sample sizes. Briefly, to evaluate the associations  
 366 between aspirin and/or NSAID use and colorectal cancer stratified by genotypes  
 367 accounting for imputation, we fit the following model:  $\text{logit}(\text{Pr}[D=1]) = b_0 + b_1e + c_1p_1 +$   
 368  $c_2p_2 + \beta_1p_1e + \beta_2p_2e + \text{covariates}$ , where  $p_1$  and  $p_2$  are the imputation posterior  
 369 probabilities for genotypes A/B and B/B. The stratified effects of aspirin and/or NSAID  
 370 use were estimated by  $\hat{\beta}_1$ ,  $\hat{\beta}_1 + \hat{\beta}_2$ ,  $\hat{\beta}_1 + \hat{\beta}_2$  for genotype A/A, A/B, and B/B, respectively with



371 standard errors obtained by using the standard formula for linear combination of two  
372 parameters based on the covariance matrix of these parameter estimators.

373

374 **Calculation of absolute risk:**

375 We calculated absolute risks for each genotype of the SNPs showing G X E interaction.  
376 Briefly, based upon the Surveillance, Epidemiology, and End Results (SEER) age-  
377 adjusted colorectal cancer incidence rate (denoted by “I”) between 2007-2011 among the  
378 White population of 42.9 per 100,000 men and women per year, we estimated the  
379 reference incidence rate of colorectal cancer (denoted by “ $I_{\text{reference}}$ ”) using the  
380 following formula:  $I_{\text{reference}} = I / (P(\text{AA, non-E}) + OR_{\text{Aa/aa, non-E}} P(\text{Aa/aa, non-}$   
381  $\text{E}) + OR_{\text{AA, E}} P(\text{AA, E}) + OR_{\text{Aa/aa, E}} P(\text{Aa/aa, E}))$ , where  $P(\text{genotype, E (or}$   
382  $\text{non-E)})$  is the prevalence of aspirin and/or NSAID use (or non-use) in each  
383 corresponding genotype category among controls (non-cases). Based on this reference  
384 incidence rate of colorectal cancer (i.e.,  $I_{\text{reference}}$ ), we further calculated absolute  
385 colorectal cancer incidence rates within each subgroup defined by genotype of the SNPs  
386 according to aspirin and/or NSAID use or non-use by multiplying the  $I_{\text{reference}}$  with  
387 each corresponding OR.

388

389 **Calculation of  $D'$  and  $r^2$ :**

390 To examine whether the two SNPs identified from conventional logistic regression analysis  
391 are correlated, we obtained  $D'$  and  $r^2$  using HapMap CEU population data. Briefly, the  
392 deviation of the observed frequency of two loci from the expected is a quantity called the  
393 linkage disequilibrium (LD) and is commonly denoted by  $D$ .  $r^2$  is the squared correlation,

394 where  $r$  scales  $D$  by the standard deviations of the allele frequencies at two loci.  $D'$  scales  $D$   
395 by dividing it by the theoretical maximum for the observed allele frequencies. A value of 0  
396 for  $D'$  indicates that the examined loci are in fact independent of one another, while a value  
397 of 1 demonstrates complete dependency (i.e., two SNPs are highly correlated).

## References

- 398 1. Newcomb PA, Baron J, Cotterchio M, et al. Colon Cancer Family Registry: an  
399 international resource for studies of the genetic epidemiology of colon cancer.  
400 *Cancer epidemiology, biomarkers & prevention : a publication of the American*  
401 *Association for Cancer Research, cosponsored by the American Society of*  
402 *Preventive Oncology*. Nov 2007;16(11):2331-2343.
- 403 2. Figueiredo JC, Lewinger JP, Song C, et al. Genotype-environment interactions in  
404 microsatellite stable/microsatellite instability-low colorectal cancer: results from a  
405 genome-wide association study. *Cancer epidemiology, biomarkers & prevention :  
406 a publication of the American Association for Cancer Research, cosponsored by  
407 the American Society of Preventive Oncology*. May 2011;20(5):758-766.
- 408 3. Brenner H, Chang-Claude J, Seiler CM, Rickert A, Hoffmeister M. Protection  
409 from colorectal cancer after colonoscopy: a population-based, case-control study.  
410 *Ann Intern Med*. Jan 4 2011;154(1):22-30.
- 411 4. Lilla C, Verla-Tebit E, Risch A, et al. Effect of NAT1 and NAT2 genetic  
412 polymorphisms on colorectal cancer risk associated with exposure to tobacco  
413 smoke and meat consumption. *Cancer epidemiology, biomarkers & prevention : a  
414 publication of the American Association for Cancer Research, cosponsored by the  
415 American Society of Preventive Oncology*. Jan 2006;15(1):99-107.
- 416 5. Slattery ML, Potter J, Caan B, et al. Energy balance and colon cancer--beyond  
417 physical activity. *Cancer Res*. Jan 1 1997;57(1):75-80.
- 418 6. Rimm EB, Stampfer MJ, Colditz GA, Chute CG, Litin LB, Willett WC. Validity  
419 of self-reported waist and hip circumferences in men and women. *Epidemiology*.  
420 Nov 1990;1(6):466-473.
- 421 7. Belanger CF, Hennekens CH, Rosner B, Speizer FE. The nurses' health study. *Am  
422 J Nurs*. Jun 1978;78(6):1039-1040.
- 423 8. Cotterchio M, Manno M, Klar N, McLaughlin J, Gallinger S. Colorectal screening  
424 is associated with reduced colorectal cancer risk: a case-control study within the  
425 population-based Ontario Familial Colorectal Cancer Registry. *Cancer Causes  
426 Control*. Sep 2005;16(7):865-875.
- 427 9. Cotterchio M, McKeown-Eyssen G, Sutherland H, et al. Ontario familial colon  
428 cancer registry: methods and first-year response rates. *Chronic Dis Can*.  
429 2000;21(2):81-86.
- 430 10. Zanke BW, Greenwood CM, Rangrej J, et al. Genome-wide association scan  
431 identifies a colorectal cancer susceptibility locus on chromosome 8q24. *Nature  
432 genetics*. Aug 2007;39(8):989-994.
- 433 11. Prorok PC, Andriole GL, Bresalier RS, et al. Design of the Prostate, Lung,  
434 Colorectal and Ovarian (PLCO) Cancer Screening Trial. *Controlled clinical  
435 trials*. Dec 2000;21(6 Suppl):273S-309S.
- 436 12. Gohagan JK, Prorok PC, Hayes RB, Kramer BS. The Prostate, Lung, Colorectal  
437 and Ovarian (PLCO) Cancer Screening Trial of the National Cancer Institute:  
438 history, organization, and status. *Controlled clinical trials*. Dec 2000;21(6  
439 Suppl):251S-272S.

- 440 13. Newcomb PA, Zheng Y, Chia VM, et al. Estrogen plus progestin use,  
441 microsatellite instability, and the risk of colorectal cancer in women. *Cancer Res.*  
442 Aug 1 2007;67(15):7534-7539.
- 443 14. White E, Patterson RE, Kristal AR, et al. VITamins And Lifestyle cohort study:  
444 study design and characteristics of supplement users. *American journal of*  
445 *epidemiology.* Jan 1 2004;159(1):83-93.
- 446 15. Hays J, Hunt JR, Hubbell FA, et al. The Women's Health Initiative recruitment  
447 methods and results. *Ann Epidemiol.* Oct 2003;13(9 Suppl):S18-77.
- 448 16. Design of the Women's Health Initiative clinical trial and observational study.  
449 The Women's Health Initiative Study Group. *Controlled clinical trials.* Feb  
450 1998;19(1):61-109.
- 451 17. Pruim RJ, Welch RP, Sanna S, et al. LocusZoom: regional visualization of  
452 genome-wide association scan results. *Bioinformatics.* Sep 15 2010;26(18):2336-  
453 2337.
- 454 18. Kury S, Buecher B, Robiou-du-Pont S, et al. Combinations of cytochrome P450  
455 gene polymorphisms enhancing the risk for sporadic colorectal cancer related to  
456 red meat consumption. *Cancer epidemiology, biomarkers & prevention : a*  
457 *publication of the American Association for Cancer Research, cosponsored by the*  
458 *American Society of Preventive Oncology.* Jul 2007;16(7):1460-1467.
- 459 19. Colditz GA, Hankinson SE. The Nurses' Health Study: lifestyle and health among  
460 women. *Nat Rev Cancer.* May 2005;5(5):388-396.
- 461 20. Giovannucci E, Rimm EB, Stampfer MJ, Colditz GA, Ascherio A, Willett WC.  
462 Aspirin use and the risk for colorectal cancer and adenoma in male health  
463 professionals. *Ann Intern Med.* Aug 15 1994;121(4):241-246.
- 464 21. Sever ML, Salo PM, Haynes AK, Zeldin DC. Inner-city environments and  
465 mitigation of cockroach allergen. *Am J Prev Med.* Aug 2011;41(2 Suppl 1):S55-  
466 56.
- 467 22. Price AL, Patterson NJ, Plenge RM, Weinblatt ME, Shadick NA, Reich D.  
468 Principal components analysis corrects for stratification in genome-wide  
469 association studies. *Nat Genet.* Aug 2006;38(8):904-909.
- 470 23. Browning SR, Browning BL. Rapid and accurate haplotype phasing and missing-  
471 data inference for whole-genome association studies by use of localized haplotype  
472 clustering. *American journal of human genetics.* Nov 2007;81(5):1084-1097.
- 473 24. Li Y, Willer CJ, Ding J, Scheet P, Abecasis GR. MaCH: using sequence and  
474 genotype data to estimate haplotypes and unobserved genotypes. *Genetic*  
475 *epidemiology.* Dec 2010;34(8):816-834.
- 476 25. Nothnagel M, Ellinghaus D, Schreiber S, Krawczak M, Franke A. A  
477 comprehensive evaluation of SNP genotype imputation. *Human genetics.* Mar  
478 2009;125(2):163-171.
- 479 26. Gogele M, Minelli C, Thakkinstian A, et al. Methods for meta-analyses of  
480 genome-wide association studies: critical assessment of empirical evidence.  
481 *American journal of epidemiology.* Apr 15 2012;175(8):739-749.
- 482 27. Jiao S, Hsu L, Hutter CM, Peters U. The use of imputed values in the meta-  
483 analysis of genome-wide association studies. *Genetic epidemiology.* Nov  
484 2011;35(7):597-605.

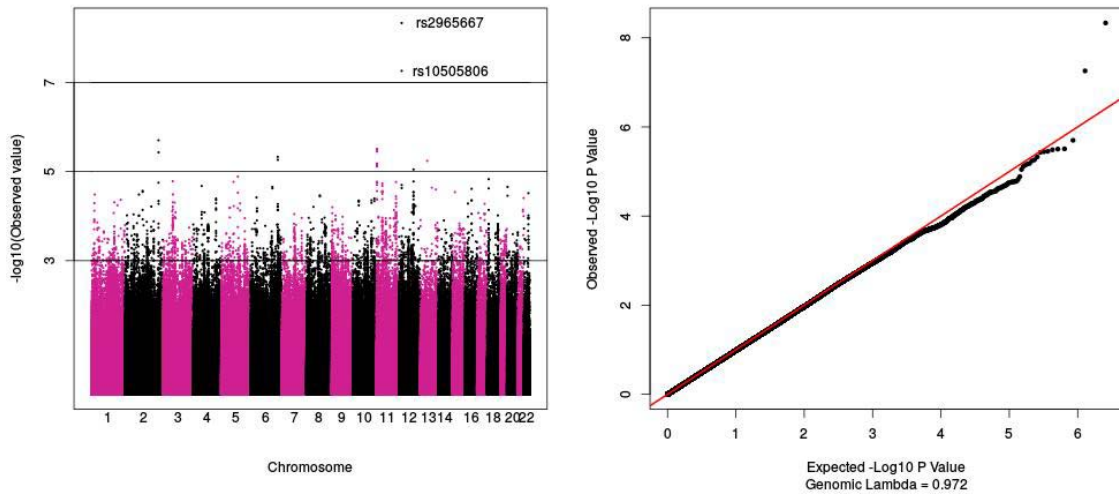

**Supplementary Figure 1. Manhattan plot and Q-Q plot for the interaction results with aspirin and/or NSAIDs (meta-analysis) from conventional logistic regression analysis**

“Aspirin and/or NSAIDs” includes the regular use of aspirin-only, NSAIDs-only, or both aspirin and NSAIDs.

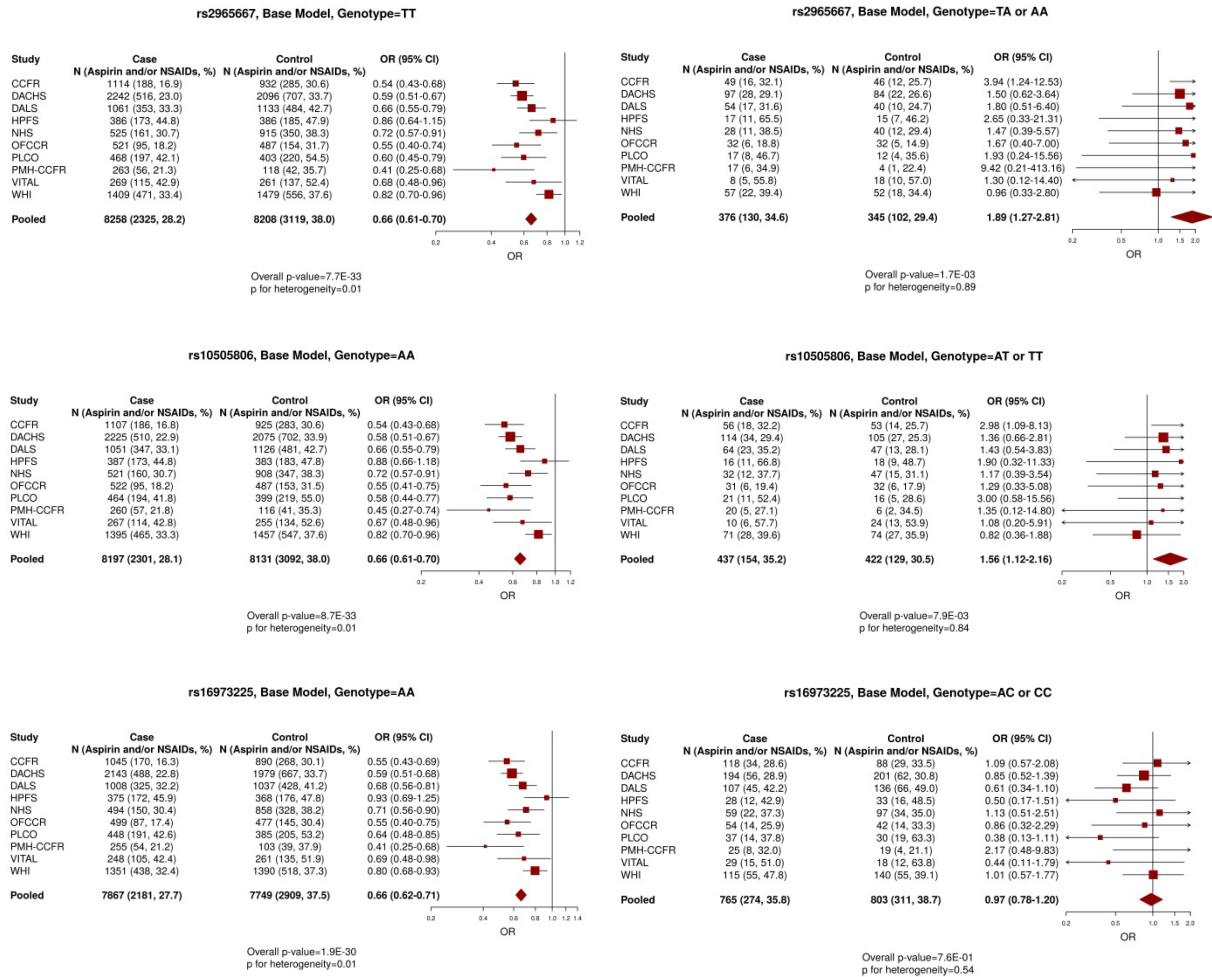

## Supplementary Figure 2. Risk for colorectal cancer according to regular use of aspirin and/or NSAIDs, stratified by the genotypes of rs2965667, rs10505806, and rs16973225

“Aspirin and/or NSAIDs” includes the regular use of aspirin-only, NSAIDs-only, or both aspirin and NSAIDs. The size of the data markers is proportional to the precision of the estimate, which is the inverse of the variance.

## Case-control interaction, rs2965667

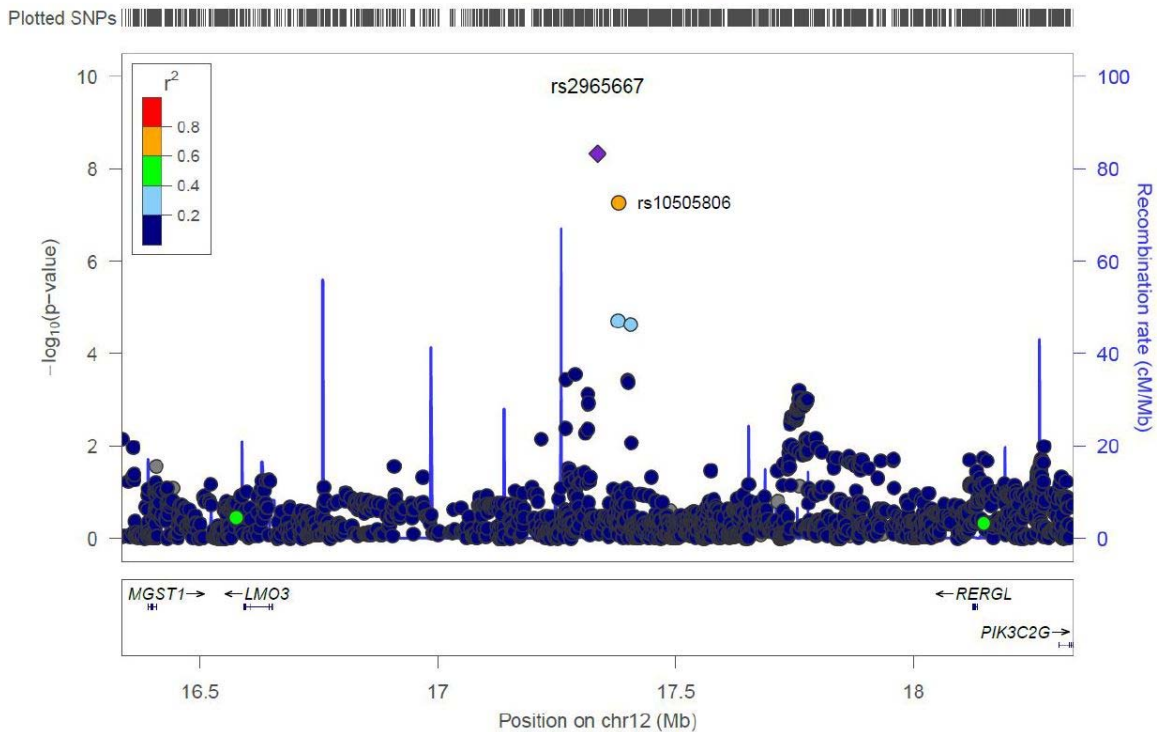

### Supplementary Figure 3: Regional association plot of 1000 kb for the interaction between regular use of aspirin and/or NSAIDs and rs2965667, as well as surrounding SNPs

“Aspirin and/or NSAIDs” includes the regular use of aspirin-only, NSAIDs-only, or both aspirin and NSAIDs. The top half of the figure has physical position along the x-axis, and the  $-\log_{10}$  of the meta-analysis  $p$ -value on the y-axis. Each dot on the plot represents the  $p$ -value of the interaction for one SNP in relation to colorectal cancer conducted across all studies. The most significant SNP in the region (index SNP) is marked as a purple diamond. The color scheme represents the pairwise correlation ( $r^2$ ) for the SNPs across the region with the index SNP. Interaction was calculated using the HapMap CEU data. The bottom half of the figure shows the position of the genes across the region. The genomic coordinate is in NCBI36.1/hg18.

## Case-only interaction, rs16973225

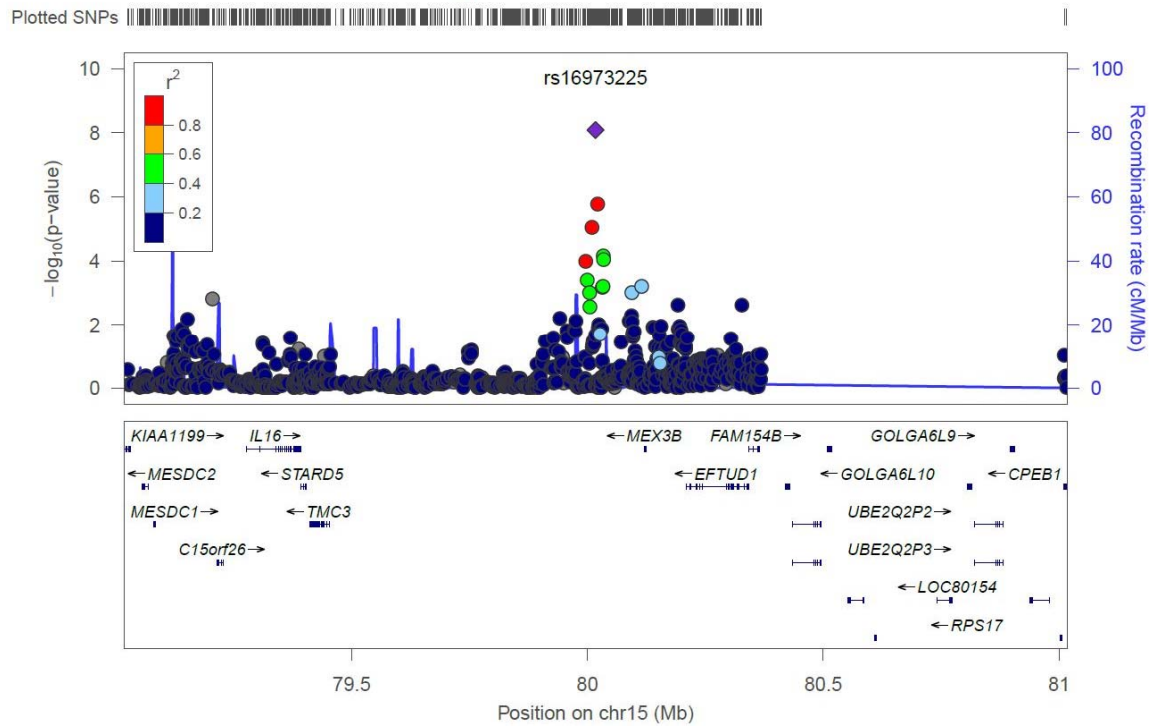

### Supplementary Figure 4: Regional association plot of 1000 kb for the interaction between regular use of aspirin and/or NSAIDs and rs16973225, as well as surrounding SNPs

“Aspirin and/or NSAIDs” includes the regular use of aspirin-only, NSAIDs-only, or both aspirin and NSAIDs. The top half of the figure has physical position along the x-axis, and the  $-\log_{10}$  of the meta-analysis  $p$ -value on the y-axis. Each dot on the plot represents the  $p$ -value of the interaction for one SNP in relation to colorectal cancer conducted across all studies. The most significant SNP in the region (index SNP) is marked as a purple diamond. The color scheme represents the pairwise correlation ( $r^2$ ) for the SNPs across the region with the index SNP. Interaction was calculated using the HapMap CEU data. The bottom half of the figure shows the position of the genes across the region. The genomic coordinate is in NCBI36.1/hg18.



485 **Supplementary Table 1. Details on genotyping platform and quality assurance and quality control (QA/QC measurements)<sup>a</sup>**

| Study       | Genotyping Platform <sup>b</sup> | Duplicate Concordance (%) | Sample Call Rate (Mean) | SNP Exclusions <sup>c</sup> (#) | SNPs Passing QC (#) | SNP Call Rate (Mean) | No. of Imputed SNPs by R <sup>2</sup> |         |           |
|-------------|----------------------------------|---------------------------|-------------------------|---------------------------------|---------------------|----------------------|---------------------------------------|---------|-----------|
|             |                                  |                           |                         |                                 |                     |                      | < 0.3                                 | 0.3-0.8 | > 0.8     |
| DACHS Set 1 | 300K                             | 99.9%                     | 99.93%                  | 33,588                          | 255,208             | 99.90%               | 70,989                                | 434,295 | 1,869,458 |
| DACHS Set 2 | 730K                             | 100%                      | 99.84%                  | 32,159                          | 609,115             | 99.85%               | 18,551                                | 154,813 | 1,865,294 |
| DALS Set 1  | 550K, 610K                       | >97% <sup>d</sup>         | 99.69%                  | 34,644                          | 516,631             | 99.82%               | 20,173                                | 180,322 | 1,912,832 |
| DALS Set 2  | 300K                             | 100%                      | 99.94%                  | 32,885                          | 250,320             | 99.94%               | 69,289                                | 438,282 | 1,867,371 |
| HPFS Set 1  | 730K                             | 99.9%                     | 99.93%                  | 32,953                          | 612,091             | 99.93%               | 18,257                                | 150,880 | 1,857,252 |
| HPFS Set 2  | 730K                             | 99.9%                     | 99.83%                  | 51,725                          | 590,132             | 99.84%               | 20,040                                | 160,464 | 1,861,553 |
| NHS Set 1   | 730K                             | 100%                      | 99.93%                  | 47,295                          | 628,541             | 99.93%               | 17,142                                | 147,723 | 1,855,814 |
| NHS Set 2   | 730K                             | 100%                      | 99.81%                  | 53,328                          | 594,015             | 99.81%               | 19,434                                | 160,804 | 1,875,767 |
| PLCO Set 2  | 300K                             | 99.9%                     | 99.80%                  | 38,655                          | 253,702             | 99.90%               | 68,059                                | 434,769 | 1,870,311 |
| PMH-CCFR    | 300K                             | 99.9%                     | 99.89%                  | 39,275                          | 256,743             | 99.92%               | 67,818                                | 429,887 | 1,875,260 |
| VITAL       | 300K                             | 99.9%                     | 99.81%                  | 36,805                          | 243,625             | 99.89%               | 73,966                                | 461,036 | 1,845,318 |
| WHI Set 1   | 550Kduo, 610K                    | >97% <sup>d</sup>         | 99.60%                  | 40,276                          | 511,251             | 99.77%               | 21,655                                | 184,833 | 1,914,909 |
| WHI Set 2   | 300K                             | 100%                      | 99.96%                  | 27,392                          | 251,707             | 99.96%               | 72,272                                | 442,111 | 1,864,141 |

486 We note that genotyping for some cohorts was conducted at two different time points (i.e., sets 1 and 2) based on the availability of funds and samples. We  
 487 accounted for this accordingly in the statistical analysis by analyzing each set separately before meta-analyzing data. Also, we have genotyped the cases and their  
 488 matched controls together at the same time to avoid bias.

489 <sup>a</sup> CCFR and OFCCR had QA/QC performed separately by CCCR and OFCCR investigators as documented in Zanke et al. 2007 and Figueiredo et al. 2011.

490 All QA/QC numbers are based on the total number of subjects with GWAS data per study.

491 <sup>b</sup> All platforms were Illumina assays, except for OFCCR, which was genotyped using Affymetrix products.

492 <sup>c</sup> Directly genotyped SNPs were excluded for a call rate < 98%, *P*-value for Hardy Weinberg Equilibrium (HWE) < 1 x 10<sup>-4</sup>, and low minor allele frequency  
 493 (MAF < 5% for WHI Set 1 and DALS Set 1; MAF < 5 / # of samples for each other study; this MAF reflects exclusions going into imputation step, not  
 494 exclusions for marginal association analysis), and if SNPs reportedly did not perform consistently across platforms.

495 <sup>d</sup> Blinded duplicates were assessed across DALS set 1 and WHI Set 1; exact concordance was not recorded, but all 98 pairs were identified as having  
 496 concordance > 97%.

497

498 **Supplementary Table 2. Interaction between regular use of aspirin-only and rs2965667 on the risk of colorectal cancer**

|                                                          | <b>rs2965667 genotype</b> |                                                    |                         |                                      | <b>OR (95% CI) for genotype within strata of aspirin</b> |
|----------------------------------------------------------|---------------------------|----------------------------------------------------|-------------------------|--------------------------------------|----------------------------------------------------------|
|                                                          | <b>TT</b>                 |                                                    | <b>TA/AA</b>            |                                      |                                                          |
|                                                          | <b>N Cases/Controls</b>   | <b>OR (95% CI)</b>                                 | <b>N Cases/Controls</b> | <b>OR (95% CI)</b>                   |                                                          |
| <b>Non-regular aspirin users</b>                         | 5,603/5,207               | 1.00                                               | 238/237                 | 0.92 (0.73-1.15)<br><i>P</i> = 0.46  | 0.91 (0.72-1.15)<br><i>P</i> = 0.43                      |
| <b>Regular aspirin users</b>                             | 1,714/2,353               | 0.68 (0.63-0.74)<br><i>P</i> = 1x10 <sup>-21</sup> | 101/81                  | 1.58 (1.09-2.29)<br><i>P</i> = 0.016 | 2.27 (1.54-3.35)<br><i>P</i> = 3.4x10 <sup>-5</sup>      |
| <b>OR (95% CI) for aspirin within strata of genotype</b> |                           | 0.68 (0.63-0.74)<br><i>P</i> = 1x10 <sup>-21</sup> |                         | 1.72 (1.12-2.65)<br><i>P</i> = 0.014 |                                                          |

499 ORs are calculated after adjusting for age at the reference time, sex, center, and the first three principal components from EIGENSTRAT.

500  
501

**Supplementary Table 3. Imputation quality for three SNPs (rs2965667, rs10505806 and rs16973225) identified in this study**

| <b>rs2965667</b>  | <b>Study</b> | <b>Imputed/Genotyped</b> | <b>Allele 'A' frequency (%)</b> | <b>Imputation R<sup>2</sup></b> |
|-------------------|--------------|--------------------------|---------------------------------|---------------------------------|
|                   | CCFR         | Imputed                  | 2.4                             | 0.703                           |
|                   | OFCCR        | Imputed                  | 3.2                             | 0.977                           |
|                   | DACHS Set 1  | Imputed                  | 1.9                             | 0.625                           |
|                   | DACHS Set 2  | Imputed                  | 2.1                             | 0.634                           |
|                   | DALS Set 1   | Imputed                  | 1.6                             | 0.689                           |
|                   | DALS Set 2   | Imputed                  | 2.0                             | 0.697                           |
|                   | HPFS Set 1   | Imputed                  | 2.0                             | 0.669                           |
|                   | HPFS Set 2   | Imputed                  | 1.9                             | 0.620                           |
|                   | NHS Set 1    | Imputed                  | 2.1                             | 0.683                           |
|                   | NHS Set 2    | Imputed                  | 2.3                             | 0.601                           |
|                   | PLCO Set 2   | Imputed                  | 1.5                             | 0.587                           |
|                   | PMH-CCFR     | Imputed                  | 1.7                             | 0.749                           |
|                   | VITAL        | Imputed                  | 3.2                             | 0.627                           |
|                   | WHI Set 1    | Imputed                  | 2.1                             | 0.649                           |
|                   | WHI Set 2    | Imputed                  | 1.8                             | 0.606                           |
| <b>rs10505806</b> | <b>Study</b> | <b>Imputed/Genotyped</b> | <b>Allele 'T' frequency</b>     | <b>Imputation R<sup>2</sup></b> |
|                   | CCFR         | Imputed                  | 2.8                             | 0.787                           |
|                   | OFCCR        | Imputed                  | 3.2                             | 1.000                           |
|                   | DACHS Set 1  | Imputed                  | 1.8                             | 0.790                           |
|                   | DACHS Set 2  | Imputed                  | 2.4                             | 0.797                           |
|                   | DALS Set 1   | Imputed                  | 2.4                             | 0.779                           |
|                   | DALS Set 2   | Imputed                  | 2.4                             | 0.831                           |
|                   | HPFS Set 1   | Imputed                  | 2.2                             | 0.787                           |
|                   | HPFS Set 2   | Imputed                  | 2.2                             | 0.739                           |
|                   | NHS Set 1    | Imputed                  | 2.3                             | 0.794                           |
|                   | NHS Set 2    | Imputed                  | 3.2                             | 0.771                           |
|                   | PLCO Set 2   | Imputed                  | 2.0                             | 0.793                           |
|                   | PMH-CCFR     | Imputed                  | 2.3                             | 0.842                           |
|                   | VITAL        | Imputed                  | 4.4                             | 0.827                           |
|                   | WHI Set 1    | Imputed                  | 2.6                             | 0.726                           |
|                   | WHI Set 2    | Imputed                  | 2.7                             | 0.807                           |
| <b>rs16973225</b> | <b>Study</b> | <b>Imputed/Genotyped</b> | <b>Allele 'C' frequency</b>     | <b>Imputation R<sup>2</sup></b> |
|                   | CCFR         | Imputed                  | 4.6                             | 0.955                           |
|                   | OFCCR        | Imputed                  | 4.1                             | 0.991                           |
|                   | DACHS Set 1  | Genotyped                | 4.8                             | NA                              |
|                   | DACHS Set 2  | Genotyped                | 4.6                             | NA                              |
|                   | DALS Set 1   | Imputed                  | 6.0                             | 0.930                           |
|                   | DALS Set 2   | Genotyped                | 5.8                             | NA                              |
|                   | HPFS Set 1   | Genotyped                | 4.1                             | NA                              |
|                   | HPFS Set 2   | Genotyped                | 4.4                             | NA                              |
|                   | NHS Set 1    | Genotyped                | 5.7                             | NA                              |
|                   | NHS Set 2    | Imputed                  | 2.5                             | 1.000                           |
|                   | PLCO Set 2   | Genotyped                | 3.7                             | NA                              |
|                   | PMH-CCFR     | Genotyped                | 7.8                             | NA                              |
|                   | VITAL        | Imputed                  | 3.4                             | 0.805                           |
|                   | WHI Set 1    | Imputed                  | 4.9                             | 0.928                           |
|                   | WHI Set 2    | Genotyped                | 4.6                             | NA                              |

502

503 **Supplementary Table 4. Additional descriptive characteristics of study populations**

| Study    | Female No. (%) |            | Mean Age (range, yrs) |              | Smoking <sup>a</sup> No. (%) |             | BMI (kg/cm <sup>2</sup> ) Mean (SD) |            | Alcohol (g/day) Mean (SD) |             | Red meat (serving/day) Mean (SD) |           |
|----------|----------------|------------|-----------------------|--------------|------------------------------|-------------|-------------------------------------|------------|---------------------------|-------------|----------------------------------|-----------|
|          | Cases          | Controls   | Cases                 | Controls     | Cases                        | Controls    | Cases                               | Controls   | Cases                     | Controls    | Cases                            | Controls  |
| CCFR     | 558 (48)       | 509 (52)   | 51.1 (17-81)          | 58 (21-76)   | 553 (47.5)                   | 549 (56.1)  | 28.2 (7.4)                          | 26.9 (6)   | -                         | -           | 0.7 (0.6)                        | 0.6 (0.5) |
| DACHS    | 952 (40.7)     | 849 (38.9) | 68.5 (33-94)          | 69 (34-99)   | 1389 (59.4)                  | 1216 (55.8) | 27 (4.1)                            | 26.3 (3.7) | 15.9 (21.4)               | 14.5 (18.9) | 0.8 (0.4)                        | 0.7 (0.3) |
| DALS     | 497 (44.6)     | 530 (45.2) | 63.7 (30-78)          | 64 (28-79)   | 636 (57)                     | 597 (50.9)  | 27.7 (5.3)                          | 26.4 (4.5) | 11 (23.3)                 | 9.2 (18.7)  | 1.1 (0.8)                        | 1 (0.8)   |
| HPFS     | -              | -          | 65.2 (48-82)          | 65.2 (48-83) | 218 (54.1)                   | 208 (51.9)  | 26.3 (3.2)                          | 25.4 (3.3) | 14.3 (17.4)               | 12.3 (15)   | 0.9 (0.7)                        | 0.7 (0.6) |
| NHS      | 553 (100)      | 955 (100)  | 59.5 (44-69)          | 59.9 (44-69) | 326 (59)                     | 529 (55.4)  | 25.4 (4.5)                          | 25.5 (4.3) | 5.9 (10.1)                | 5.8 (10.6)  | 0.7 (0.6)                        | 0.7 (0.5) |
| OFCCR    | 352 (63.7)     | 225 (43.4) | 61.6 (33-77)          | 62.7 (29-77) | 309 (55.9)                   | 305 (58.8)  | 26.2 (4.3)                          | 26.3 (4.5) | -                         | -           | 0.6 (0.6)                        | 0.6 (0.5) |
| PMH-CCFR | 280 (100)      | 122 (100)  | 63.3 (48-73)          | 61.6 (48-73) | 38 (13.6)                    | 15 (12.3)   | 27.8 (6.1)                          | 25.5 (4.8) | -                         | -           | 0.4 (0.3)                        | 0.4 (0.4) |
| PLCO     | 207 (42.7)     | 175 (42.2) | 63.7 (55-75)          | 63.6 (55-75) | 270 (55.7)                   | 212 (51.1)  | 27.5 (4.4)                          | 27.3 (4.3) | 13.2 (26)                 | 11.8 (21.7) | 1.2 (1)                          | 1.2 (1)   |
| VITAL    | 133 (48)       | 135 (48.4) | 66.4 (51-76)          | 66.6 (50-76) | 176 (63.5)                   | 153 (54.8)  | 28.1 (5.7)                          | 26.9 (4.6) | 12.5 (21.2)               | 7.5 (13.9)  | 0.7 (0.5)                        | 0.6 (0.5) |
| WHI      | 1466 (100)     | 1531 (100) | 66.3 (50-79)          | 66.4 (50-79) | 769 (52.5)                   | 724 (47.3)  | 28.3 (5.6)                          | 27.6 (5.5) | 5.4 (10.7)                | 5.2 (9.8)   | 0.7 (0.6)                        | 0.7 (0.6) |

504 <sup>a</sup> Sample size of ever smokers in each study, i.e., including both former and current smokers.

505 **Supplementary Table 5. Risk for colorectal cancer according to regular use of**  
506 **aspirin and/or NSAIDs, stratified by the genotypes of rs2965667, rs10505806, and**  
507 **rs16973225**

| <b>rs2965667<sup>a</sup></b>                   | <b>Non-regular aspirin and/or NSAID users</b> | <b>Regular aspirin and/or NSAID users</b> | <b>P-value</b>        |
|------------------------------------------------|-----------------------------------------------|-------------------------------------------|-----------------------|
| <b>TT</b>                                      |                                               |                                           |                       |
| Cases/Controls                                 | 5,933/5,088                                   | 2,325/3,119                               |                       |
| Base Model (OR) <sup>c</sup>                   | 1.00                                          | 0.66 (0.61-0.70)                          | 1.1x10 <sup>-32</sup> |
| Multivariable-Adjusted Model (OR) <sup>d</sup> | 1.00                                          | 0.63 (0.59-0.68)                          | 3.1x10 <sup>-35</sup> |
| <b>TA</b>                                      |                                               |                                           |                       |
| Cases/Controls                                 | 243/240                                       | 126/101                                   |                       |
| Base Model (OR) <sup>c</sup>                   | 1.00                                          | 1.74 (1.16-2.61)                          | 0.01                  |
| Multivariable-Adjusted Model (OR) <sup>d</sup> | 1.00                                          | 1.62 (1.06-2.48)                          | 0.03                  |
| <b>AA</b>                                      |                                               |                                           |                       |
| Cases/Controls                                 | 3/4                                           | 4/1                                       |                       |
| Base Model (OR) <sup>c</sup>                   | 1.00                                          | -                                         | -                     |
| Multivariable-Adjusted Model (OR) <sup>d</sup> | 1.00                                          | -                                         | -                     |
| <i>P</i> for interaction <sup>e</sup>          |                                               | 4.6x10 <sup>-9</sup>                      |                       |
| <b>rs10505806<sup>a</sup></b>                  | <b>Non-regular aspirin and/or NSAID users</b> | <b>Regular aspirin and/or NSAID users</b> | <b>P-value</b>        |
| <b>AA</b>                                      |                                               |                                           |                       |
| Cases/Controls                                 | 5,896/5,039                                   | 2,301/3,092                               |                       |
| Base Model (OR) <sup>c</sup>                   | 1.00                                          | 0.66 (0.61-0.70)                          | 1.0x10 <sup>-32</sup> |
| Multivariable-Adjusted Model (OR) <sup>d</sup> | 1.00                                          | 0.63 (0.59-0.68)                          | 4.7x10 <sup>-35</sup> |
| <b>AT</b>                                      |                                               |                                           |                       |
| Cases/Controls                                 | 279/287                                       | 150/128                                   |                       |
| Base Model (OR) <sup>c</sup>                   | 1.00                                          | 1.47 (1.05-2.05)                          | 0.02                  |
| Multivariable-Adjusted Model (OR) <sup>d</sup> | 1.00                                          | 1.34 (0.94-1.90)                          | 0.10                  |
| <b>TT</b>                                      |                                               |                                           |                       |
| Cases/Controls                                 | 4/6                                           | 4/1                                       |                       |
| Base Model (OR) <sup>c</sup>                   | 1.00                                          | -                                         | -                     |
| Multivariable-Adjusted Model (OR) <sup>d</sup> | 1.00                                          | -                                         | -                     |
| <i>P</i> for interaction <sup>e</sup>          |                                               | 5.5x10 <sup>-8</sup>                      |                       |

| rs16973225 <sup>b</sup>                        | Non-regular aspirin and/or NSAID users | Regular aspirin and/or NSAID users | P-value               |
|------------------------------------------------|----------------------------------------|------------------------------------|-----------------------|
| <b>AA</b>                                      |                                        |                                    |                       |
| Cases/Controls                                 | 5,686/4,840                            | 2,181/2,909                        |                       |
| Base Model (OR) <sup>c</sup>                   | 1.00                                   | 0.66 (0.62-0.71)                   | 1.9x10 <sup>-30</sup> |
| Multivariable-Adjusted Model (OR) <sup>d</sup> | 1.00                                   | 0.63 (0.59-0.68)                   | 3.6x10 <sup>-33</sup> |
| <b>AC</b>                                      |                                        |                                    |                       |
| Cases/Controls                                 | 475/483                                | 266/305                            |                       |
| Base Model (OR) <sup>c</sup>                   | 1.00                                   | 0.97 (0.78-1.20)                   | 0.80                  |
| Multivariable-Adjusted Model (OR) <sup>d</sup> | 1.00                                   | 0.94 (0.75-1.18)                   | 0.58                  |
| <b>CC</b>                                      |                                        |                                    |                       |
| Cases/Controls                                 | 16/9                                   | 8/6                                |                       |
| Base Model (OR) <sup>c</sup>                   | 1.00                                   | 0.85 (0.21-3.37)                   | 0.81                  |
| Multivariable-Adjusted Model (OR) <sup>d</sup> | 1.00                                   | 0.81 (0.20-3.30)                   | 0.77                  |
|                                                | <i>P</i> for interaction <sup>e</sup>  | 8.2x10 <sup>-9</sup>               |                       |

508 The numbers of cases and controls were from the Base Model.  
509 We note that because the stratified analyses were based on the three genotypes, the *p*-values corresponding  
510 to the wild-genotype are slightly different from that in Table 2 where the homozygous variant genotype  
511 was grouped with the heterozygous genotype due to the low count of homozygous variant genotype.  
512 “Aspirin and/or NSAIDs” includes the regular use of aspirin-only, NSAIDs-only, or both aspirin and  
513 NSAIDs.  
514 “- ”: ORs (95% CIs) and *p*-values cannot be estimated due to small sample size in this group.  
515 <sup>a</sup> SNPs rs2965667 and rs10505806 were identified from conventional logistic regression analysis.  
516 <sup>b</sup> SNP rs16973225 was identified from case-only interaction analysis.  
517 <sup>c</sup> ORs in Base Models are adjusted for age at the reference time, sex, center, and the first three principal  
518 components from EIGENSTRAT.  
519 <sup>d</sup> ORs in Multivariable-Adjusted Models are adjusted for age at the reference time, sex, center, the first  
520 three principal components, smoking status (never, former, or current smoker), BMI, alcohol consumption,  
521 and red meat consumption.  
522 <sup>e</sup> *P*-values for interactions were calculated after adjusting for age at the reference time, sex, center, and the  
523 first three principal components from EIGENSTRAT.  
524

525 **Supplementary Table 6. Interactions between regular use of aspirin and/or NSAIDs and genotypes of rs2965667, rs10505806,**  
 526 **and rs16973225 on the risk of colorectal cancer**

|                                                                        | <b>rs2965667 genotype</b>  |                                                       |                         |                                      | <b>OR (95% CI) for genotype within strata of aspirin and/or NSAIDs</b> |
|------------------------------------------------------------------------|----------------------------|-------------------------------------------------------|-------------------------|--------------------------------------|------------------------------------------------------------------------|
|                                                                        | <b>TT</b>                  |                                                       | <b>TA/AA</b>            |                                      |                                                                        |
|                                                                        | <b>N Cases/Controls</b>    | <b>OR (95% CI)</b>                                    | <b>N Cases/Controls</b> | <b>OR (95% CI)</b>                   |                                                                        |
| <b>Non-regular aspirin and/or NSAID users</b>                          | 5,933/5,088                | 1.00                                                  | 246/244                 | 0.81 (0.64-1.01)<br><i>P</i> = 0.06  | 0.80 (0.63-1.00)<br><i>P</i> = 0.05                                    |
| <b>Regular aspirin and/or NSAID users</b>                              | 2,325/3,119                | 0.66 (0.61-0.70)<br><i>P</i> = 7.7 x10 <sup>-33</sup> | 130/102                 | 1.52 (1.09-2.12)<br><i>P</i> = 0.014 | 2.36 (1.67-3.34)<br><i>P</i> = 1.1 x10 <sup>-6</sup>                   |
| <b>OR (95% CI) for aspirin and/or NSAIDs within strata of genotype</b> |                            | 0.66 (0.61-0.70)<br><i>P</i> = 7.7 x10 <sup>-33</sup> |                         | 1.89 (1.27-2.81)<br><i>P</i> = 0.002 |                                                                        |
|                                                                        | <b>rs10505806 genotype</b> |                                                       |                         |                                      | <b>OR (95% CI) for genotype within strata of aspirin and/or NSAIDs</b> |
|                                                                        | <b>AA</b>                  |                                                       | <b>AT/TT</b>            |                                      |                                                                        |
|                                                                        | <b>N Cases/Controls</b>    | <b>OR (95% CI)</b>                                    | <b>N Cases/Controls</b> | <b>OR (95% CI)</b>                   |                                                                        |
| <b>Non-regular aspirin and/or NSAID users</b>                          | 5,896/5,039                | 1.00                                                  | 283/293                 | 0.78 (0.64-0.94)<br><i>P</i> = 0.011 | 0.78 (0.64-0.94)<br><i>P</i> = 0.10                                    |
| <b>Regular aspirin and/or NSAID users</b>                              | 2,301/3,092                | 0.66 (0.61-0.70)<br><i>P</i> = 8.7 x10 <sup>-33</sup> | 154/129                 | 1.21 (0.93-1.59)<br><i>P</i> = 0.16  | 1.88 (1.42-2.49)<br><i>P</i> = 1.2 x10 <sup>-5</sup>                   |
| <b>OR (95% CI) for aspirin and/or NSAIDs within strata of genotype</b> |                            | 0.66 (0.61-0.70)<br><i>P</i> = 8.7 x10 <sup>-33</sup> |                         | 1.56 (1.12-2.16)<br><i>P</i> = 0.008 |                                                                        |
|                                                                        | <b>rs16973225 genotype</b> |                                                       |                         |                                      | <b>OR (95% CI) for genotype within strata of aspirin and/or NSAIDs</b> |
|                                                                        | <b>AA</b>                  |                                                       | <b>AC/CC</b>            |                                      |                                                                        |
|                                                                        | <b>N Cases/Controls</b>    | <b>OR (95% CI)</b>                                    | <b>N Cases/Controls</b> | <b>OR (95% CI)</b>                   |                                                                        |
| <b>Non-regular aspirin and/or NSAID users</b>                          | 5,686/4,840                | 1.00                                                  | 491/492                 | 0.83 (0.72-0.95)<br><i>P</i> = 0.006 | 0.82 (0.72-0.94)<br><i>P</i> = 0.005                                   |
| <b>Regular aspirin and/or NSAID users</b>                              | 2,181/2,909                | 0.66 (0.62-0.71)<br><i>P</i> = 1.9 x10 <sup>-30</sup> | 274/311                 | 0.80 (0.67-0.95)<br><i>P</i> = 0.012 | 1.23 (1.03-1.47)<br><i>P</i> = 0.025                                   |
| <b>OR (95% CI) for aspirin and/or NSAIDs within strata of genotype</b> |                            | 0.66 (0.62-0.71)<br><i>P</i> = 1.9 x10 <sup>-30</sup> |                         | 0.97 (0.78-1.20)<br><i>P</i> = 0.76  |                                                                        |

527 ORs are calculated after adjusting for age at the reference time, sex, center, and the first three principal components from EIGENSTRAT.  
 528 "Aspirin and/or NSAIDs" includes the regular use of aspirin-only, NSAIDs-only, or both aspirin and NSAIDs.  
 529
